# Supplementary material for: Integrated cardio-behavioral responses to threat define defensive states
Source: PubMed Central journal article supplement (PMC9991919; doi:10.1038/s41593-022-01252-w), 2023-02-09
Supplement: 41593_2022_1252_MOESM1_ESM.pdf [file 41593_2022_1252_MOESM1_ESM.pdf]

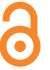

---

# Integrated cardio-behavioral responses to threat define defensive states

---

In the format provided by the authors and unedited

**Supplementary Table 1**

| Figure    | Normality test               | Pairwise test                       | Comparison                       | Tail       | p-value                                                                    | Group analysis | F-statistic (or Chi-square) | p-value    |
|-----------|------------------------------|-------------------------------------|----------------------------------|------------|----------------------------------------------------------------------------|----------------|-----------------------------|------------|
| 2b        | passed                       | unpaired Student's t-test           | HR vs HR-to-ceiling              | two-tailed | 1.2291e-07                                                                 |                |                             |            |
| 3a        | failed                       | post-hoc with Bonferroni correction | Behaviours                       | two-tailed | cf matrix                                                                  | Kruskal-Wallis | (5,164) = 118.7625          | 5.7388e-24 |
| 3b        | failed                       | post-hoc with Bonferroni correction | Contexts                         | two-tailed | cf matrix                                                                  | Kruskal-Wallis | F(8,145) = 81.8844          | 2.0398e-14 |
| 4a        | passed                       | post-hoc with Bonferroni correction | EPM subareas                     | two-tailed | Open arm vs closed arm:<br>5.57469e-05<br>Center vs closed arm:<br>0.02329 | one-way ANOVA  | F(2, 60) = 10.9428          | 8.8782e-05 |
| 4b        | passed                       | post-hoc with Bonferroni correction | LDB subareas                     | two-tailed | Light vs corridor:<br>0.033799<br>Light vs dark: 0.0092517                 | one-way ANOVA  | F(2, 42) = 5.7107           | 0.0064004  |
| 4c        | passed                       | -                                   | OF subareas                      | -          | -                                                                          | one-way ANOVA  | F(2, 66) = 0.21763          | 0.805      |
| 4j        | passed                       | post-hoc with Bonferroni correction | EPM subareas                     | two-tailed | Open arm vs closed arm:<br>2.1636e-05<br>Center vs closed arm:<br>0.012626 | one-way ANOVA  | F(2, 56) = 12.377           | 3.5372e-05 |
| 4k        | passed                       | -                                   | LDB subareas                     | -          | -                                                                          | one-way ANOVA  | F(2, 30) = 2.3881           | 0.10904    |
| 4l        | passed                       | -                                   | OF subareas                      | -          | -                                                                          | one-way ANOVA  | F(2, 58) = 0.23383          | 0.79224    |
| 4d top    | passed                       | unpaired Student's t-test           | Closed to open vs open to closed | two-tailed | 1.3966e-10                                                                 |                |                             |            |
| 4d bottom | failed                       | Mann-Whitney                        | Closed to open vs open to closed | two-tailed | 3.9446e-07                                                                 |                |                             |            |
| 4e top    | passed                       | unpaired Student's t-test           | Light to dark vs dark to light   | two-tailed | 1.6518e-04                                                                 |                |                             |            |
| 4e bottom | passed                       | unpaired Student's t-test           | Light to dark vs dark to light   | two-tailed | 0.7214                                                                     |                |                             |            |
| 4f top    | failed                       | Mann-Whitney                        | Inner to outer vs outer to inner | two-tailed | 0.3345                                                                     |                |                             |            |
| 4f bottom | failed                       | Mann-Whitney                        | Inner to outer vs outer to inner | two-tailed | 0.0022586                                                                  |                |                             |            |
| 4g        | passed (no homoscedasticity) | post-hoc with Bonferroni correction | EPM subareas                     | two-tailed | Open arm vs center:<br>0.0995780<br>Open arm vs closed arm:<br>4.1001e-07  | Kruskal-Wallis | (2,60) = 28.1091            | 7.8737e-07 |

|                     |                                 |                                     |                                                  |            |                                                                                         |                       |                                                                                                      |             |
|---------------------|---------------------------------|-------------------------------------|--------------------------------------------------|------------|-----------------------------------------------------------------------------------------|-----------------------|------------------------------------------------------------------------------------------------------|-------------|
| 4h                  | passed<br>(no homoscedasticity) | post-hoc with Bonferroni correction | LDB subareas                                     | two-tailed | Light vs corridor: 2.3937e-08<br>Light vs dark: 0.0084048<br>Dark vs corridor: 0.016298 | Kruskal-Wallis        | (2,42) = 33.2947                                                                                     | 5.8905e-08  |
| 4i                  | failed                          | post-hoc with Bonferroni correction | OF subareas                                      | two-tailed | Center vs corners: 2.8572e-04<br>Center vs inner ring: 0.0011572                        | Kruskal-Wallis        | (2,66) = 18.6355                                                                                     | 8.9816e-05  |
| 4n                  | -                               | -                                   | Closed vs open arm                               | one-tailed |                                                                                         | F test                | (3,419) = 15.9772<br>(with p = 1-df(F))                                                              | 0           |
| 5g                  | passed                          | post-hoc with Sidak correction      | Controls vs ArchT (immobility during inhibition) | two-tailed | Trial 1: <0.0001<br>Trial 2: 0.0134<br>Trial 3: 0.0314<br>Trial 4: 0.1126               | RM ANOVA              | (1, 7) = 15.62                                                                                       | 0.0055      |
| 6f                  | -                               | -                                   | Cluster 1 vs cluster 2                           | one-tailed |                                                                                         | F test                | (3,916) = 38.4872<br>(with p = 1-df(F))                                                              | 7.4734e-10  |
| Ext. Data 2a        | failed                          | Mann-Whitney                        | HR vs HR-to-ceiling                              | two-tailed | 8.8985e-04                                                                              |                       |                                                                                                      |             |
| Ext. Data 2b        | passed                          | unpaired Student's t-test           | HR vs HR-to-ceiling                              | two-tailed | 0.0017082                                                                               |                       |                                                                                                      |             |
| Ext. Data 2g top    | passed                          | paired Student's t-test             | Pre-CS vs pure tone                              | two-tailed | 0.86001                                                                                 |                       |                                                                                                      |             |
| Ext. Data 2h top    | passed                          | paired Student's t-test             | Pre-CS vs pure tone                              | two-tailed | 0.0042966                                                                               |                       |                                                                                                      |             |
| Ext. Data 2g bottom | failed                          | Wilcoxon signed-rank                | Pre-CS vs pure tone                              | two-tailed | 0.81408                                                                                 |                       |                                                                                                      |             |
| Ext. Data 2h bottom | passed                          | paired Student's t-test             | Pre-CS vs pure tone                              | two-tailed | 0.0041187                                                                               |                       |                                                                                                      |             |
| Ext. Data 3a        | passed                          | post-hoc with Bonferroni correction | Behaviours                                       | two-tailed | cf matrix                                                                               | one-way ANOVA         | F(5,164) = 8.2619                                                                                    | 5.5314e-07  |
| Ext. Data 3b        | failed                          | post-hoc with Bonferroni correction | Behaviours                                       | two-tailed | cf matrix                                                                               | Kruskal-Wallis        | (5,164) = 74.1437                                                                                    | 1.4037e-14  |
| Ext. Data 3d        | -                               | post-hoc with Tukey's test          | Behaviours, time                                 | two-tailed | -                                                                                       | RMANOVA (mixed model) | Behaviours: F (1.661, 202.1) = 58.43<br>Time: F (5, 165) = 42.95<br>Interaction: F (15, 365) = 14.08 | All <0.0001 |
| Ext. Data 3f        | failed                          | post-hoc with Bonferroni correction | Contexts                                         | two-tailed | cf matrix                                                                               | Kruskal-Wallis        | (8, 145) = 77.0866                                                                                   | 7.5145e-13  |
| Ext. Data 3g        | failed                          | post-hoc with Bonferroni correction | Contexts                                         | two-tailed | cf matrix                                                                               | Kruskal-Wallis        | (8, 145) = 77.0866                                                                                   | 7.5145e-13  |
| Ext. Data 3h        | failed                          | post-hoc with Bonferroni correction | Contexts                                         | two-tailed | cf matrix                                                                               | Kruskal-Wallis        | (8, 145) = 57.2016                                                                                   | 1.6447e-09  |

|                     |                                 |                                     |              |            |                                                                                                                                                                                   |                |                     |            |
|---------------------|---------------------------------|-------------------------------------|--------------|------------|-----------------------------------------------------------------------------------------------------------------------------------------------------------------------------------|----------------|---------------------|------------|
| Ext. Data 3i        | passed<br>(no homoscedasticity) | post-hoc with Bonferroni correction | Contexts     | two-tailed | cf matrix                                                                                                                                                                         | Kruskal-Wallis | F(8,145) = 60.9944  | 2.9733e-10 |
| Ext. Data 4a left   | passed                          | -                                   | EPM subareas | -          | -                                                                                                                                                                                 | one-way ANOVA  | F(2, 60) = 0.048052 | 0.95312    |
| Ext. Data 4a right  | passed                          | post-hoc with Bonferroni correction | EPM subareas | two-tailed | Open arm vs closed arm:<br>0.02808                                                                                                                                                | one-way ANOVA  | F(2, 55) = 3.632    | 0.032997   |
| Ext. Data 4b left   | passed                          | -                                   | LDB subareas | -          | -                                                                                                                                                                                 | one-way ANOVA  | F(2, 42) = 0.7631   | 0.47257    |
| Ext. Data 4b right  | passed                          | -                                   | LDB subareas | -          | -                                                                                                                                                                                 | one-way ANOVA  | F(2, 30) = 2.0124   | 0.15131    |
| Ext. Data 4c left   | passed                          | -                                   | OF subareas  | -          | -                                                                                                                                                                                 | one-way ANOVA  | F(2, 66) = 0.022819 | 0.97745    |
| Ext. Data 4c right  | failed                          | -                                   | OF subareas  | -          | -                                                                                                                                                                                 | Kruskal-Wallis | (2, 58) = 4.1024    | 0.12858    |
| Ext. Data 4d bottom | failed                          | post-hoc with Bonferroni correction | EPM subareas | two-tailed | Open arm vs middle:<br>0.0046<br>Open arm vs closed arm:<br>0.0134<br>Closed arm vs middle:<br><0.001                                                                             | Kruskal-Wallis | F(2, 54) = 36.1628  | 1.404e-08  |
| Ext. Data 4e bottom | failed                          | post-hoc with Bonferroni correction | LDB subareas | two-tailed | Light vs dark: 0.0017<br>Corridor vs dark: <0.001                                                                                                                                 | Kruskal-Wallis | F(2, 51) = 32.3964  | 9.2302e-08 |
| Ext. Data 4f bottom | failed                          | post-hoc with Bonferroni correction | OF subareas  | two-tailed | Center vs inner square:<br>0.0011<br>Center vs outer square:<br><0.001<br>Center vs corners: <0.001<br>Inner square vs outer square: 0.0046<br>Outer square vs corners:<br>0.0329 | Kruskal-Wallis | F(3,72) = 51.1569   | 4.5296e-11 |
| Ext. Data 4m        | failed                          | post-hoc with Bonferroni correction | EPM subareas | two-tailed | Open arm vs closed arm:<br>0.022858                                                                                                                                               | Kruskal-Wallis | (2, 60) = 7.5139    | 0.023355   |
| Ext. Data 4n        | passed<br>(no homoscedasticity) | post-hoc with Bonferroni correction | LDB subareas | two-tailed | Corridor vs dark:<br>0.034221s                                                                                                                                                    | Kruskal-Wallis | (2, 42) = 7.6274    | 0.022066   |
| Ext. Data 4o        | passed                          | -                                   | OF subareas  | -          | -                                                                                                                                                                                 | one-way ANOVA  | F(2, 66) = 1.56     | 0.21779    |
| Ext. Data 4p        | passed                          | post-hoc with Bonferroni correction | EPM subareas | two-tailed | Open arm vs closed arm:<br>4.1732e-06                                                                                                                                             | one-way ANOVA  | F(2, 60) = 14.4068  | 7.7652e-06 |

|              |                                    |                                        |                                                           |            |                                                                          |                  |                    |           |
|--------------|------------------------------------|----------------------------------------|-----------------------------------------------------------|------------|--------------------------------------------------------------------------|------------------|--------------------|-----------|
|              |                                    |                                        |                                                           |            | Center vs closed arm:<br>0.014911                                        |                  |                    |           |
| Ext. Data 4q | passed<br>(no<br>homoscedasticity) | post-hoc with<br>Bonferroni correction | LDB subareas                                              | two-tailed | Light vs corridor:<br>0.00033399<br>Light vs dark: 0.014955              | Kruskal-Wallis   | (2, 42) = 15.9567  | 0.0003428 |
| Ext. Data 4r | passed                             | -                                      | OF subareas                                               | -          | -                                                                        | one-way<br>ANOVA | F(2, 66) = 0.13698 | 0.87223   |
| Ext. Data 4s | failed                             | post-hoc with<br>Bonferroni correction | EPM subareas                                              | two-tailed | Open arm vs center:<br>0.023973<br>Open arm vs closed arm:<br>0.0027776  | Kruskal-Wallis   | (2,34) = 12.51     | 0.0019208 |
| Ext. Data 5e | passed                             | post-hoc with Sidak<br>correction      | Controls vs ArchT<br>(motion during<br>inhibition)        | two-tailed | Trial 1: 0.0001<br>Trial 2: 0.0003<br>Trial 3: 0.0057<br>Trial 4: 0.0021 | RM ANOVA         | (1, 7) = 30.97     | 0.0008    |
| Ext. Data 5e | passed                             | post-hoc with Sidak<br>correction      | Controls vs ArchT<br>(HR-to-ceiling<br>during inhibition) | two-tailed | Trial 1: 0.9426<br>Trial 2: 0.9983<br>Trial 3: 0.0015<br>Trial 4: 0.3389 | RM ANOVA         | (1, 7) = 7.808     | 0.0267    |
| Ext. Data 5e | passed                             | -                                      | Controls vs ArchT<br>(intertrial<br>immobility)           | -          | -                                                                        | RM ANOVA         | (1, 7) = 2.091     | 0.1914    |
